# Supplementary material
Source: Springer Nature journal article supplement (https://www.springermedizin.de/resource/supplementary/12968_2011_2606_MOESM4_ESM.pdf/9582308)

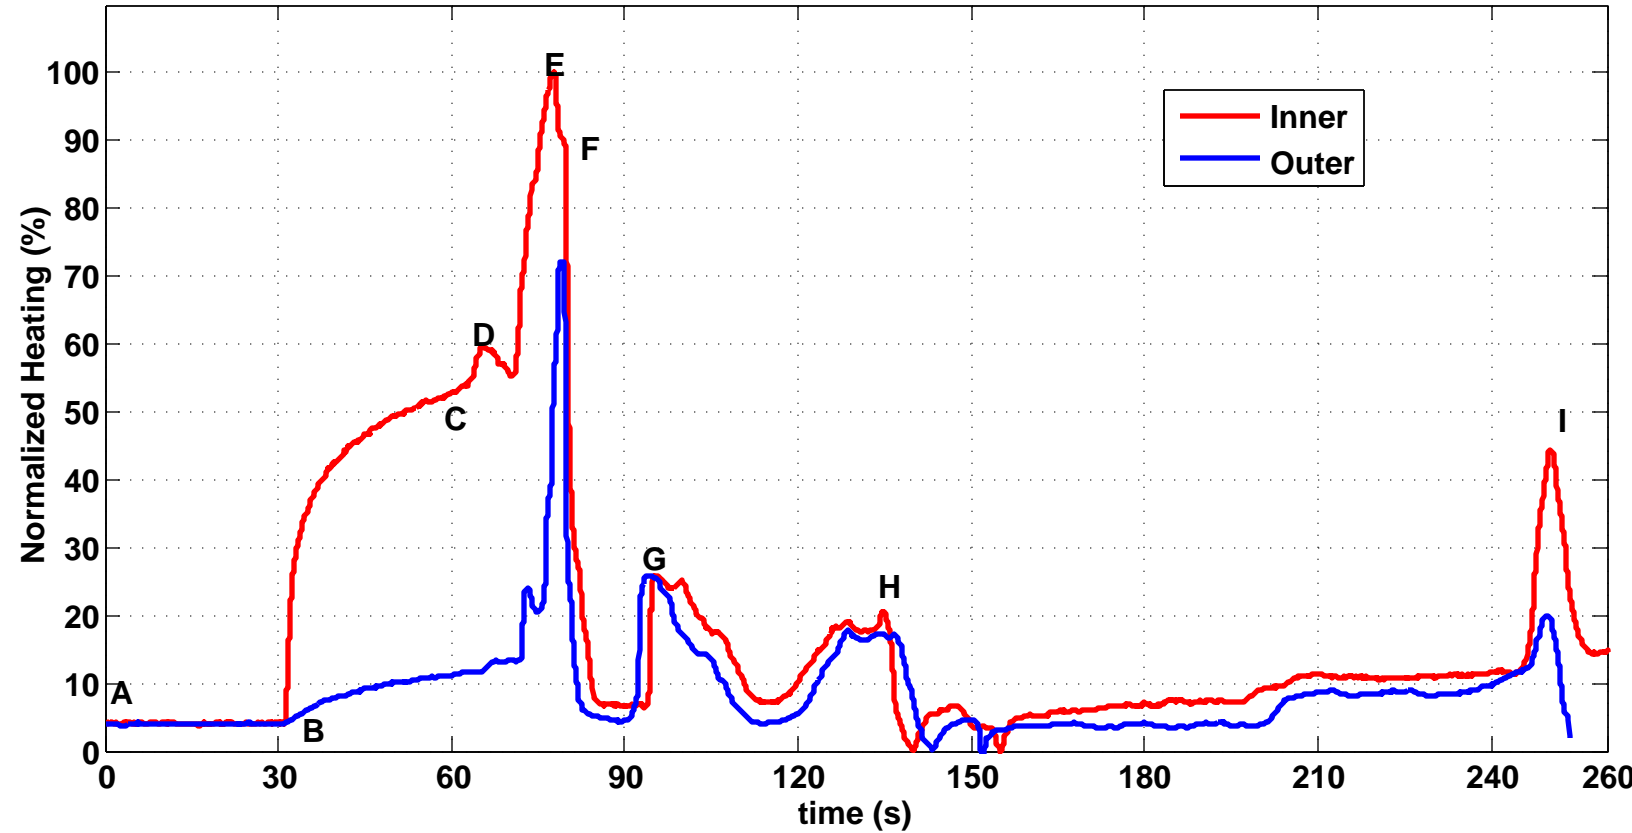

Supplement: MOESM4 [file 9582308]
